# Supplementary material
Source: publisher figshare collection journal article supplement (https://acs.figshare.com/ndownloader/files/24851089)
Supplement: Supplementary file 1 [file 24851089]

## Supporting Information

### Sn-W Co-doping Improves Thermochromic Performance of VO<sub>2</sub> Film for Smart Window

Zhengjing Zhao<sup>†</sup>, Yi Liu<sup>†</sup>, Zhinong Yu<sup>‡</sup>, Chen Ling<sup>†</sup>, Jingbo Li<sup>†,§,\*</sup>, Yongjie Zhao<sup>†</sup>,  
Haibo Jin<sup>†,\*</sup>

<sup>†</sup> Beijing Key Laboratory of Construction Tailorable Advanced Functional Materials and Green Applications, School of Materials Science and Engineering, Beijing Institute of Technology, Beijing 100081, China.

<sup>‡</sup> Beijing Engineering Research Center of Mixed Reality and Advanced Display, School of Optics and Photonics, Beijing Institute of Technology, Beijing 100081, China

<sup>§</sup> Beijing Institute of Technology Chongqing Innovation Center, Chongqing 401120, China

\* Corresponding authors

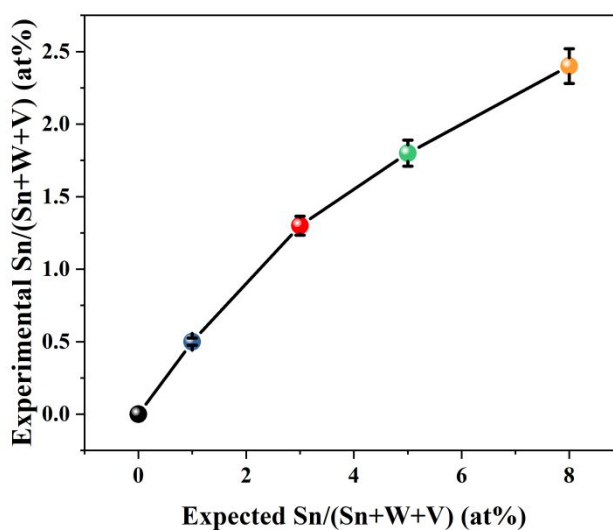

**Figure S1.** The Sn content of the Sn-W co-doped VO<sub>2</sub> films (S1-S5) determined by ICP. The abscissa is the expected composition, i.e. the input ratio of Sn/(Sn+W+V) in

the precursor solution during the hydrothermal process.

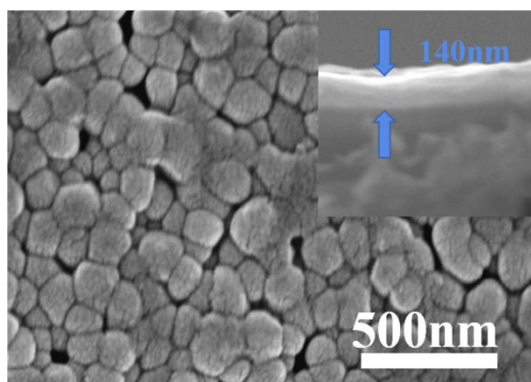

**Figure S2.** The SEM image of S0 film (undoped) and the inset indicates the thickness of S0 film is  $\sim 140$  nm.

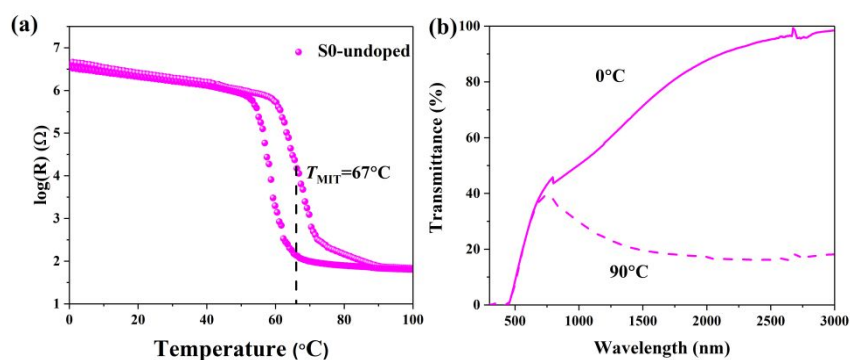

**Figure S3.** (a) Temperature dependent resistance of the S0 (undoped); (b) Transmittance spectra of the S0 film measured at 0  $^{\circ}\text{C}$  (real line) and 90  $^{\circ}\text{C}$  (dashed line).

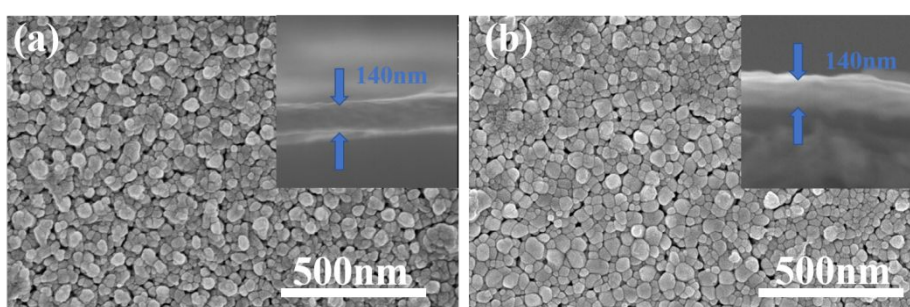

**Figure S4.** The SEM image:(a) S6; (b) S7. The insets are the corresponding cross-sectional views, indicating that the films possess similar thickness of  $\sim 140$  nm.

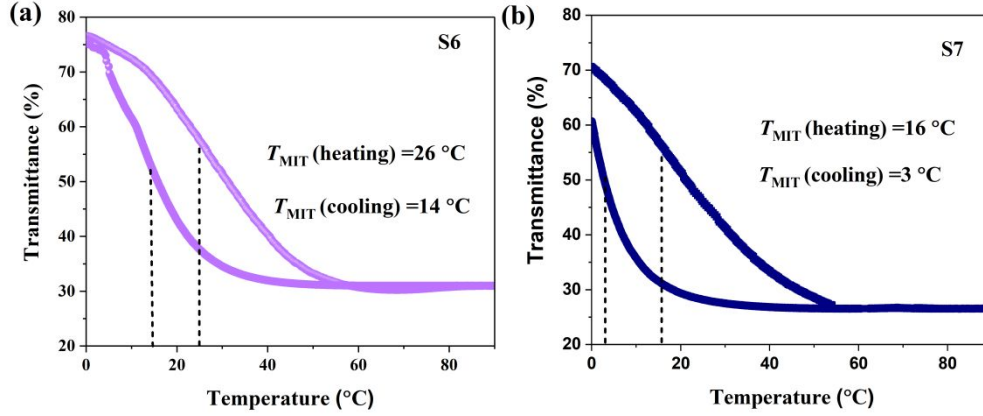

**Figure S5.** Hysteresis loop of the temperature-dependent transmittance (measured at the temperature range of 0 - 90°C, with a heating/cooling rate of 10 °C/min) of the Sn-W co-doped VO<sub>2</sub> samples at a wavelength 2500 nm: (a) S6; (b) S7.

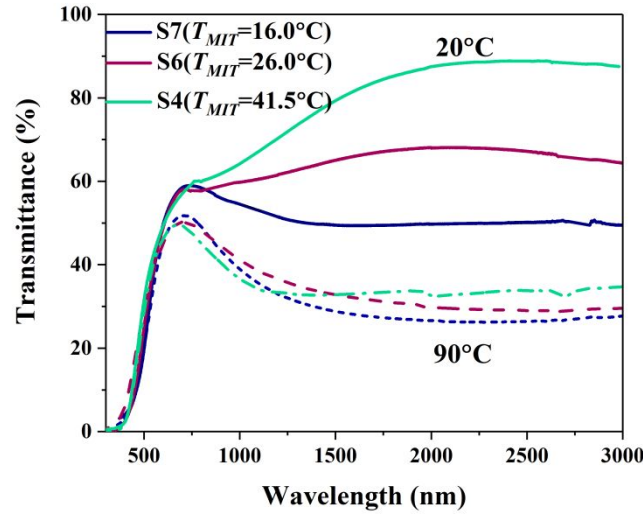

**Figure S6.** (a) Transmittance spectra of the Sn-W co-doped VO<sub>2</sub> films with different W contents (S4, S6, S7): (S4:  $T_{lum} \sim 40.7\%$ ,  $\Delta T_{sol} \sim 13.6\%$ ; S6:  $T_{lum} \sim 40.2\%$ ,  $\Delta T_{sol} \sim 10.5\%$ ; S7:  $T_{lum} \sim 40.4\%$ ,  $\Delta T_{sol} \sim 8.9\%$ ). The real lines denote transmittance measured at 20 °C, and the dashed lines are measured at 90 °C.

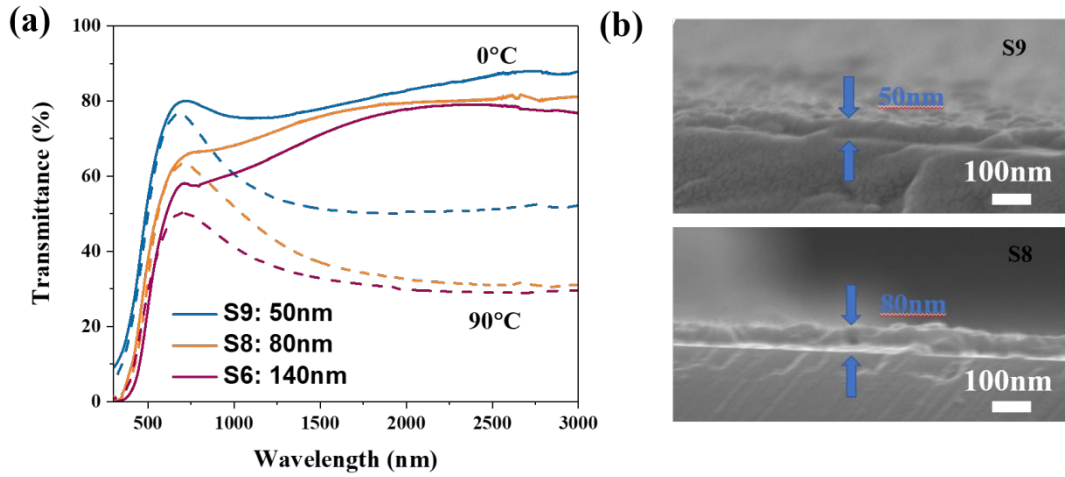

**Figure S7.** (a) Transmittance spectra of the Sn-W co-doped VO<sub>2</sub> films with different thickness: (S6: ~140 nm,  $T_{lum}$  ~41.1%,  $\Delta T_{sol}$  ~12.6%; S8: ~80nm,  $T_{lum}$  ~47.7%,  $\Delta T_{sol}$  ~11.3%; S9: ~50nm,  $T_{lum}$  ~63.3%,  $\Delta T_{sol}$  ~9.8%). (b) cross-sectional views of S8 and S9 films.

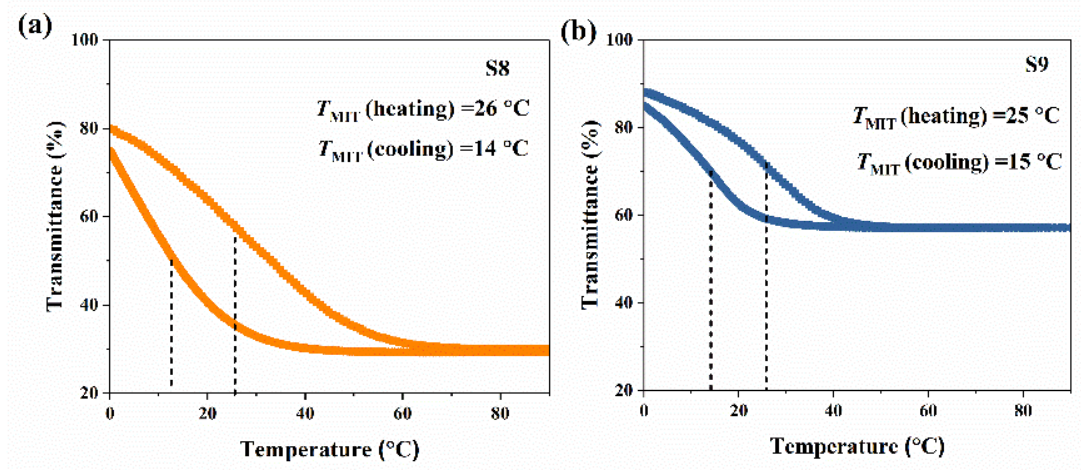

**Figure S8.** Hysteresis loop of the temperature-dependent transmittance (measured at the temperature range of 0 - 90°C, with a heating/cooling rate of 10 °C/min) of the Sn-W co-doped VO<sub>2</sub> samples at a wavelength 2500 nm: (a) S8; (b) S9.
